# Supplementary material
Source: MDPI journal article supplement (https://www.mdpi.com/2079-9292/12/10/2307)
Supplement: s1 [file s1]

Archive with 1 entries (1 files):
- electronics-2370862-supplementary.pdf
